# Supplementary material
Source: publisher site journal article supplement (https://www.dovepress.com/get_supplementary_file.php?f=348035.docx)
Supplement: Supplementary file 1 [file get_supplementary_file.php]

Table S1. Univariate analysis of logistic regression for cardiac mortality.

| Variables | B | S.E. | Wald | HR | 95%CI | P Value |
| --- | --- | --- | --- | --- | --- | --- |
| Sex(female) | 0.052 | 0.452 | 0.013 | 1.053 | 0.434-2.555 | 0.908 |
| Age>65 | 0.413 | 0.371 | 1.237 | 1.512 | 0.730-3.130 | 0.266 |
| prior MI | 0.308 | 0.354 | 0.756 | 1.360 | 0.680-2.721 | 0.385 |
| Hypertension | -0.244 | 0.350 | 0.488 | 0.783 | 0.395-1.554 | 0.485 |
| Diabetes mellitus | 0.456 | 0.350 | 1.703 | 1.578 | 0.795-3.133 | 0.192 |
| CTO location |  |  |  |  |  |  |
| LAD | 0.450 | 0.350 | 1.657 | 1.568 | 0.790-3.112 | 0.198 |
| RCA | 0.650 | 0.363 | 3.216 | 1.916 | 0.941-3.899 | 0.073 |
| LCX | 0.001 | 0.370 | 0.000 | 1.001 | 0.485-2.069 | 0.997 |
| multiple CTOs | 1.063 | 0.353 | 9.053 | 2.895 | 1.448-5.784 | 0.003 |
| revascularization | -0.747 | 0.351 | 4.546 | 0.474 | 0.238-0.941 | 0.033 |
| renal dysfunction | 0.781 | 0.459 | 2.893 | 2.184 | 0.888-5.372 | 0.089 |
| LVEF<40% | 1.654 | 0.379 | 19.037 | 5.230 | 2.487-10.998 | <0.001 |

MI = myocardial infarction; CTO = chronic total occlusion; LAD = Left anterior descending artery; LCX = Left circumflex artery; RCA = Right coronary artery; LVEF = left ventricular ejection fraction; HR = hazard ratio; CI = confidence interval.

Table S2. Univariate analysis of logistic regression for all-cause mortality.

| Variables | B | S.E. | Wald | HR | 95%CI | P Value |
| --- | --- | --- | --- | --- | --- | --- |
| Sex(female) | -0.019 | 0.332 | 0.003 | 0.981 | 0.511-1.882 | 0.954 |
| Age>65 | 0.722 | 0.285 | 6.390 | 2.058 | 1.176-3.601 | 0.011 |
| prior MI | 0.003 | 0.265 | 0.000 | 1.003 | 0.596-1.686 | 0.992 |
| Hypertension | -0.250 | 0.253 | 0.980 | 0.779 | 0.474-1.278 | 0.322 |
| Diabetes mellitus | 0.286 | 0.256 | 1.240 | 1.330 | 0.805-2.199 | 0.265 |
| CTO location |  |  |  |  |  |  |
| LAD | 0.258 | 0.254 | 1.032 | 1.295 | 0.787-2.132 | 0.310 |
| RCA | 0.387 | 0.255 | 2.300 | 1.472 | 0.893-2.426 | 0.129 |
| LCX | -0.294 | 0.284 | 1.068 | 0.745 | 0.427-1.302 | 0.301 |
| multiple CTOs | 0.534 | 0.275 | 3.769 | 1.706 | 0.995-2.925 | 0.052 |
| revascularization | -0.393 | 0.264 | 2.224 | 0.675 | 0.403-1.131 | 0.136 |
| renal dysfunction | 0.718 | 0.340 | 4.469 | 2.051 | 1.054-3.992 | 0.035 |
| LVEF<40% | 1.137 | 0.261 | 18.971 | 3.119 | 1.869-5.204 | <0.001 |

MI = myocardial infarction; CTO = chronic total occlusion; LAD = Left anterior descending artery; LCX = Left circumflex artery; RCA = Right coronary artery; LVEF = left ventricular ejection fraction; HR = hazard ratio; CI = confidence interval.

Table S3. Risk of all-cause and cardiac mortality in patients with multiple CTOs stratified by age, LVEF, and renal dysfunction.

| Variables | Single CTO | Multiple CTO  HR (95%CI) | Interaction P value |
| --- | --- | --- | --- |
| All-cause mortality |  |  |  |
| Age>65 |  |  |  |
| Yes | Reference | 1.428(0.761-2.679) | 0.382 |
| No | Reference | 2.505(0.866-7.251) |
| LVEF<40% |  |  |  |
| Yes | Reference | 1.380(0.656-2.900) | 0.990 |
| No | Reference | 1.407(0.590-3.353) |
| Renal dysfunction |  |  |  |
| Yes | Reference | 1.435(0.419-4.916) | 0.484 |
| No | Reference | 1.607(0.877-2.945) |
| Cardiac mortality |  |  |  |
| Age>65 |  |  |  |
| Yes | Reference | 2.691(1.160-6.244) | 0.130 |
| No | Reference | 3.517(0.983-12.577) |
| LVEF<40% |  |  |  |
| Yes | Reference | 2.147(0.872-5.286) | 0.835 |
| No | Reference | 2.546(0.730-8.875) |
| Renal dysfunction |  |  |  |
| Yes | Reference | 2.507(0.502-12.513) | 0.614 |
| No | Reference | 2.774(1.280-6.009) |

CTO = chronic total occlusion; LVEF = left ventricular ejection fraction; HR = hazard ratio; CI = confidence interval.
